# Supplementary material for: Co-solvation effect on the binding mode of the α-mangostin/β-cyclodextrin inclusion complex
Source: publisher site journal article supplement (doi:10.3762/bjoc.11.251), 2015-11-25
Supplement: Additional file 1 [file 1860-5397-11-251-S1.pdf]

# Supporting Information

## for

# Co-solvation effect on the binding mode of the $\alpha$ -mangostin/ $\beta$ -cyclodextrin inclusion complex

Chompoonut Rungnim<sup>1</sup>, Sarunya Phunpee<sup>1</sup>, Manaschai Kunaseth<sup>1</sup>, Supawadee Namuangruk<sup>1</sup>, Kanin Rungsardthong<sup>2</sup>, Thanyada Rungrotmongkol<sup>\*,‡,3,4,§</sup> and Uracha Ruktanonchai<sup>\*,‡,1,¶</sup>

Address: <sup>1</sup>National Nanotechnology Center (NANOTEC), National Science and Technology Development Agency (NSTDA), Pathumthani 12120, Thailand, <sup>2</sup>Faculty of Pharmacy Thammasat University, Rangsit Center, Pathumthani 12120 Thailand, <sup>3</sup>Structural and Computational Biology Unit, Department of Biochemistry, Faculty of Science, Chulalongkorn University, Bangkok 10330, Thailand and <sup>4</sup>Ph.D. Program in Bioinformatics and Computational Biology, Faculty of Science, Chulalongkorn University, Bangkok 10330, Thailand

Email: Uracha Ruktanonchai - uracha@nanotec.or.th

Email: Uracha Ruktanonchai - t.rungrotmongkol@gmail.com,

\*Corresponding Author

‡These authors contributed equally to this work

§Fax:+66(0)2564-6985; Tel.+66(0)2564-6552,

¶Fax:+66(0)2218-5418; Tel.+66(0)2218-5426

## Additional data

### 1. Parameters of $\alpha$ -mangostin

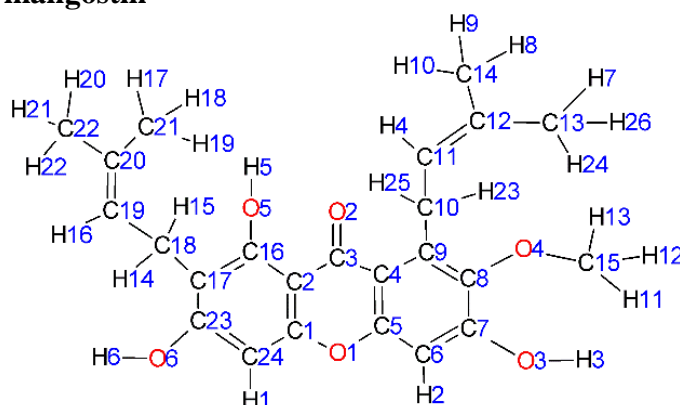

**Table S1:** Atom types and partial charges of  $\alpha$ -mangostin (C<sub>24</sub>H<sub>26</sub>O<sub>6</sub>)

| Name | Type | q       | Name | Type | q       | Name | Type | q       |
|------|------|---------|------|------|---------|------|------|---------|
| C13  | CT   | -0.2454 | O5   | OH   | -0.5789 | H5   | CA   | -0.7066 |
| H24  | HC   | 0.0774  | H5   | HO   | 0.4428  | H1   | HA   | 0.2645  |
| H26  | HC   | 0.0774  | C17  | CA   | -0.3465 | O6   | OH   | -0.6283 |
| H7   | HC   | 0.0774  | C18  | CT   | 0.1081  | H6   | HO   | 0.4754  |

| Name | Type | q       | Name | Type | q       | Name | Type | q       |
|------|------|---------|------|------|---------|------|------|---------|
| C12  | CM   | 0.1632  | C19  | CM   | -0.429  | C1   | CA   | 0.5328  |
| C14  | CT   | -0.2454 | C20  | CM   | 0.1938  | O1   | OS   | -0.3212 |
| H8   | HC   | 0.0774  | C21  | CT   | -0.3281 | C5   | CA   | 0.4579  |
| H9   | HC   | 0.0774  | H17  | HC   | 0.0989  | C6   | CA   | -0.612  |
| H10  | HC   | 0.0774  | H18  | HC   | 0.0989  | H2   | HA   | 0.2511  |
| C11  | CM   | -0.4282 | H19  | HC   | 0.0989  | C7   | CA   | 0.4545  |
| H4   | HA   | 0.1947  | C22  | CT   | -0.3281 | O3   | OH   | -0.6202 |
| C10  | CT   | 0.0641  | H20  | HC   | 0.0989  | H3   | HO   | 0.4765  |
| H23  | HC   | 0.0763  | H21  | HC   | 0.0989  | C8   | CA   | 0.0344  |
| H25  | HC   | 0.0763  | H22  | HC   | 0.0989  | O4   | OS   | -0.3791 |
| C9   | CA   | 0.0394  | H16  | HA   | 0.2054  | C15  | CT   | 0.2301  |
| C4   | CA   | -0.4221 | H14  | HC   | 0.068   | H11  | HC   | 0.0188  |
| C3   | C    | 0.7764  | H15  | HC   | 0.068   | H12  | HC   | 0.0188  |
| O2   | O    | -0.5921 | C23  | CA   | 0.548   | H13  | HC   | 0.0188  |
| C2   | CA   | -0.5643 | C16  | CA   | 0.4603  |      |      |         |

## 2. Inclusion complex of $\alpha$ -MGS/ $\beta$ -CD in a water solvation system

To explore the preferential orientation of  $\alpha$ -MGS inside the  $\beta$ -CD cavity, two conformations of inclusion complexes in water (complexes I and II in **Figure S1**) were generated and subjected to MD simulation for 20 ns. For inclusion complex I, the A ring of  $\alpha$ -MGS was placed close to the narrow rim of  $\beta$ -CD ( $O^6$  region). On the other hand, the  $\alpha$ -MGS in complex II was oriented in the opposite direction.

### 2.1 System stability

The RMSDs of the  $\alpha$ -MGS and  $\beta$ -CD, relative to their initial coordinates, were monitored along the 20 ns of MD simulation and are shown in **Figure S1 (a,b)**. During the first 15 ns, the  $\alpha$ -MGS in complex I was positioned closer to the starting structure ( $0.79 \pm 0.31$  Å) than that of complex II ( $1.23 \pm 0.28$  Å). Meanwhile, the RMSD of  $\beta$ -CD in both complexes was steady at  $\approx 1.3$  Å. Since two systems apparently reached their equilibration states after 15 ns, the trajectories from the last 5 ns were extracted for structural and binding energy analysis.

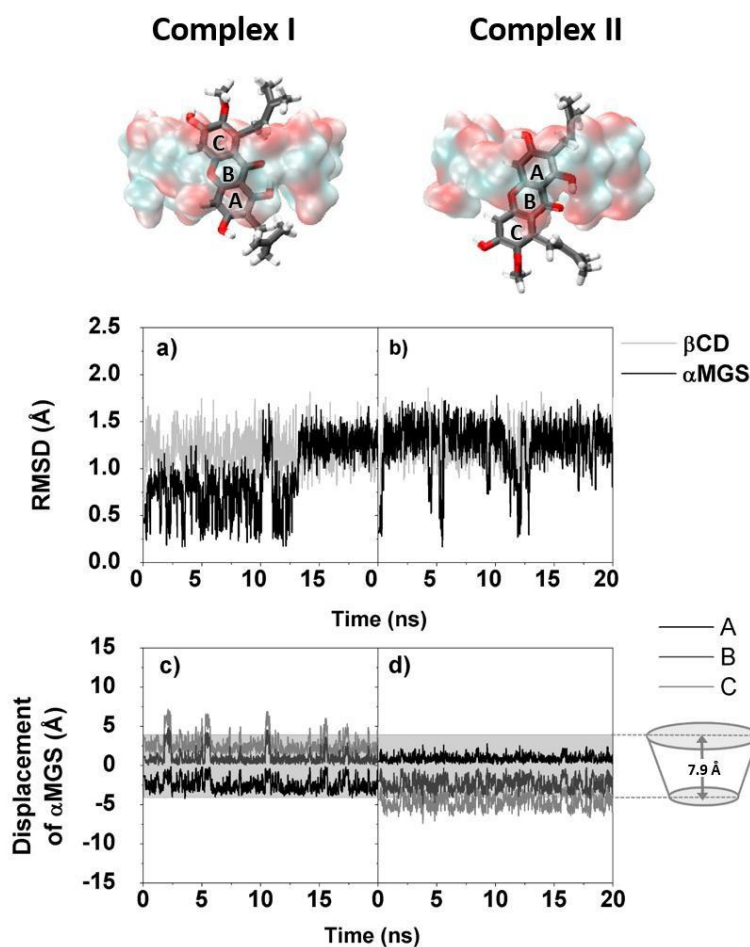

**Figure S1:** (a,b) RMSD plots of  $\alpha$ -MGS and  $\beta$ -CD with respect to their initial structures, and (c,d) displacement plots of the  $\alpha$ -MGS rings A–C versus simulation time for the inclusion complexes I and II. The last snapshot structures are depicted above the graphs, where the light blue shade represents the  $\beta$ -CD cavity.

## 2.2 Displacement of $\alpha$ -mangostin

From the displacement analysis in **Figure S1 (c-d)**, the  $\alpha$ -MGS in complex I fluctuated inside the  $\beta$ -CD cavity while its inclusion in complex II is more stable with only slight oscillation. The  $\alpha$ -MGS in complex II is also located deeper in the cavity and more towards the narrow rim of  $\beta$ -CD, as seen by the displacements of the A- and C-rings (approximately at 0.9 and  $-4.7$  Å, respectively).

## 2.3 Binding energy analysis

MM-PBSA binding free energies of the  $\alpha$ -MGS/ $\beta$ -CD complexes I and II are presented in **Table S1**. It can be seen that the binding affinities of the two forms are likely comparable ( $\Delta G_{\text{bind}}$  of  $\approx 9$  kcal/mol).

**Table S2:** MM-PBSA binding free energy and the energy components (kcal/mol) for the  $\alpha$ -MGS/ $\beta$ -CD complexes I and II

|                                            | <b>Complex I</b>  | <b>Complex II</b> |
|--------------------------------------------|-------------------|-------------------|
| $\Delta E_{\text{ele}}$                    | $-5.33 \pm 3.34$  | $-4.61 \pm 2.67$  |
| $\Delta E_{\text{vdW}}$                    | $-38.96 \pm 2.86$ | $-37.04 \pm 1.93$ |
| $\Delta E_{\text{MM}}$ (1)                 | $-44.29 \pm 4.16$ | $-41.65 \pm 3.22$ |
| $\Delta G_{\text{nsolv}}$                  | $-4.68 \pm 0.19$  | $-4.53 \pm 0.17$  |
| $\Delta G_{\text{psolv}}$                  | $27.55 \pm 4.26$  | $23.83 \pm 3.80$  |
| $\Delta G_{\text{solv}}$ (2)               | $22.87 \pm 4.22$  | $19.30 \pm 3.72$  |
| $\Delta G_{\text{psolv}} + E_{\text{ele}}$ | $18.94 \pm 2.14$  | $19.22 \pm 3.00$  |
| $\Delta G_{\text{nsolv}} + E_{\text{vdW}}$ | $-43.64 \pm 1.53$ | $-41.57 \pm 2.10$ |
| $-T\Delta S$ (3)                           | $12.56 \pm 2.72$  | $13.29 \pm 2.72$  |
| $\Delta G_{\text{bind}}$ (1)+(2)+(3)       | $-8.86 \pm 3.25$  | $-9.06 \pm 2.87$  |

## 3. Solvation accessibility

### 3.1 Solvation accessibility in pure water or ethanol

The RDF plots of the oxygen atoms of  $\alpha$ -MGS complexed with  $\beta$ -CD in pure water, and ethanol, are presented in **Figure S2**. The first solvation shell in water solvation system appears around 2 Å from oxygen atoms ( $O^2$ ,  $O^3$ ,  $O^4$  and  $O^6$ ) of the encapsulated  $\alpha$ -MGS. Differentially, a much lower accessibility of ethanol is observed in the same solvation shell around the  $O^3$  and  $O^2$  atoms.

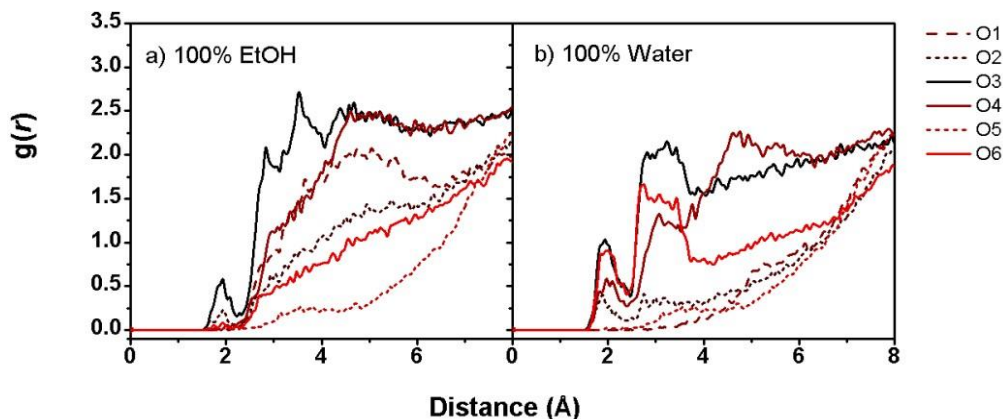

**Figure S2:** Radial distribution function (RDF,  $g(r)$ ) of (a) ethanol, and (b) water oxygens towards the ligand oxygens ( $O^1$ – $O^6$ ) of  $\alpha$ -MGS/ $\beta$ -CD complex.

### 3.2 Solvation accessibility in co-solvent

**Table S3:** Integration number,  $n(r)$ , of the first (2.2 Å) and second solvation shells (3.1 Å) around the heteroatoms of  $\alpha$ -MGS in each system

| System                 | $n(r)$ of water molecules       |                                 | $n(r)$ of ethanol molecules     |                                 |
|------------------------|---------------------------------|---------------------------------|---------------------------------|---------------------------------|
|                        | 1 <sup>st</sup> solvation shell | 2 <sup>nd</sup> solvation shell | 1 <sup>st</sup> solvation shell | 2 <sup>nd</sup> solvation shell |
| <b>Water</b>           |                                 |                                 |                                 |                                 |
| $O^1$                  | 0.0                             | 0.0                             | -                               | -                               |
| $O^2$                  | 0.2                             | 0.9                             | -                               | -                               |
| $O^3$                  | 0.7                             | 4.9                             | -                               | -                               |
| $O^4$                  | 0.4                             | 2.6                             | -                               | -                               |
| $O^5$                  | 0.0                             | 0.2                             | -                               | -                               |
| $O^6$                  | 0.7                             | 4.1                             | -                               | -                               |
| <b>5 %v/v Ethanol</b>  |                                 |                                 |                                 |                                 |
| $O^1$                  | 0.0                             | 0.0                             | 0.0                             | 0.0                             |
| $O^2$                  | 0.2                             | 1.0                             | 0.0                             | 0.0                             |
| $O^3$                  | 0.7                             | 4.6                             | 0.0                             | 0.2                             |
| $O^4$                  | 0.4                             | 2.4                             | 0.0                             | 0.2                             |
| $O^5$                  | 0.0                             | 0.2                             | 0.0                             | 0.0                             |
| $O^6$                  | 0.6                             | 3.5                             | 0.0                             | 0.4                             |
| <b>15 %v/v Ethanol</b> |                                 |                                 |                                 |                                 |
| $O^1$                  | 0.0                             | 0.0                             | 0.0                             | 0.1                             |
| $O^2$                  | 0.1                             | 0.4                             | 0.0                             | 0.2                             |
| $O^3$                  | 0.6                             | 3.7                             | 0.0                             | 1.0                             |
| $O^4$                  | 0.2                             | 1.7                             | 0.0                             | 0.6                             |
| $O^5$                  | 0.0                             | 0.2                             | 0.0                             | 0.1                             |
| $O^6$                  | 0.4                             | 2.7                             | 0.0                             | 0.7                             |
| <b>30 %v/v Ethanol</b> |                                 |                                 |                                 |                                 |

| System                 | $n(r)$ of water molecules       |                                 | $n(r)$ of ethanol molecules     |                                 |
|------------------------|---------------------------------|---------------------------------|---------------------------------|---------------------------------|
|                        | 1 <sup>st</sup> solvation shell | 2 <sup>nd</sup> solvation shell | 1 <sup>st</sup> solvation shell | 2 <sup>nd</sup> solvation shell |
| O <sup>1</sup>         | 0.0                             | 0.3                             | 0.0                             | 1.5                             |
| O <sup>2</sup>         | 0.0                             | 0.1                             | 0.0                             | 0.2                             |
| O <sup>3</sup>         | 0.6                             | 3.2                             | 0.1                             | 1.8                             |
| O <sup>4</sup>         | 0.2                             | 1.4                             | 0.0                             | 1.0                             |
| O <sup>5</sup>         | 0.0                             | 0.1                             | 0.0                             | 0.1                             |
| O <sup>6</sup>         | 0.0                             | 0.6                             | 0.0                             | 0.6                             |
| <b>60 %v/v Ethanol</b> |                                 |                                 |                                 |                                 |
| O <sup>1</sup>         | 0.0                             | 0.3                             | 0.0                             | 1.5                             |
| O <sup>2</sup>         | 0.0                             | 0.2                             | 0.0                             | 0.3                             |
| O <sup>3</sup>         | 0.4                             | 2.5                             | 0.2                             | 2.2                             |
| O <sup>4</sup>         | 0.1                             | 0.8                             | 0.0                             | 1.0                             |
| O <sup>5</sup>         | 0.0                             | 0.0                             | 0.0                             | 0.1                             |
| O <sup>6</sup>         | 0.0                             | 0.6                             | 0.0                             | 0.3                             |
| <b>Ethanol</b>         |                                 |                                 |                                 |                                 |
| O <sup>1</sup>         | -                               | -                               | 0.0                             | 1.7                             |
| O <sup>2</sup>         | -                               | -                               | 0.1                             | 1.2                             |
| O <sup>3</sup>         | -                               | -                               | 0.3                             | 4.1                             |
| O <sup>4</sup>         | -                               | -                               | 0.0                             | 2.0                             |
| O <sup>5</sup>         | -                               | -                               | 0.0                             | 0.7                             |
| O <sup>6</sup>         | -                               | -                               | 0.0                             | 0.9                             |
